# Supplementary material for: On the photolysis of simple anions and neutral molecules as sources of O−/OH, SOx−and Cl in aqueous solution
Source: Royal Society of Chemistry journal article supplement (doi:10.1039/b618565g), 2007-01-01
Supplement: b618565g.pdf [file b618565g.pdf]

**Electronic Supplementary Material (ESM)**

to

**On the Photolysis of simple Anions and neutral Molecules  
as Sources of O<sup>-</sup>/ OH, SO<sub>x</sub><sup>-</sup> and Cl in Aqueous Solution**

**Hartmut Herrmann**

Leibniz-Institut für Troposphärenforschung  
Permoserstraße 15, D-04318 Leipzig, Germany  
Tel. ++49 (0)341 235 2446, Fax. ++49 (0)341 235 2325  
Email: [herrmann@tropos.de](mailto:herrmann@tropos.de), Web: [www.tropos.de](http://www.tropos.de)

**List of Content:**

**Table S1:** Summary of available absolute decadic absorption coefficients from the literature for SO<sub>4</sub><sup>-</sup> in the range of the absorption maximum at  $\lambda = 450$  nm.

**Table S2a:** Mechanisms for the simulation calculation

**Table S2b:** Applied initial concentrations and absorption coefficients for the simulation calculation.

**Table S3:** Results to determine the absolute quantum yields of the SO<sub>4</sub><sup>-</sup> formation from the photolysis of HSO<sub>5</sub><sup>-</sup> at  $\lambda = 248$  nm.

**Figure S1:** Aqueous phase spectra of SO<sub>3</sub><sup>-</sup> and SO<sub>5</sub><sup>-</sup> from the photolysis of S<sub>2</sub>O<sub>6</sub><sup>2-</sup> at  $\lambda = 193$  nm at 298 K.

**Table S4:** Results to determine the absolute quantum yields of the SO<sub>3</sub><sup>-</sup> formation from the photolysis of S<sub>2</sub>O<sub>6</sub><sup>2-</sup> at  $\lambda = 193$  nm.

**Table S5:** Concentrations of the chlorine-containing compounds present in the carried out experiments.

**Table S6:** Parameter for the evaluation of the quantum yields from the HOCl photolysis in aqueous solution.  $\lambda = 248$  nm, T = 298 K, [HOCl] =  $4.4 \cdot 10^{-4}$  mol l<sup>-1</sup>

**Table S7:** Sink reactions for the chlorine atom in the Cl<sub>2</sub>/HOCl-system. [HOCl] = [Cl<sup>-</sup>] =  $4.4 \cdot 10^{-4}$  mol l<sup>-1</sup>

**Table S8:** Parameter for the evaluation of the quantum yields from the chloroacetone photolysis in aqueous solution.  $\lambda = 248$  nm, T = 298 K, [CH<sub>3</sub>COCH<sub>2</sub>Cl] =  $5 \cdot 10^{-4}$  mol l<sup>-1</sup>.

**Annex I** Thermochemistry of the dissociation processes in aqueous solution

**Table S9:** Applied bond dissociation energies (BDEs, kJ mol<sup>-1</sup>)

**Annex References**

**Table S1:** Summary of available absolute decadic absorption coefficients from the literature for  $\text{SO}_4^{\cdot-}$  in the range of the absorption maximum at  $\lambda = 450$  nm.

| Authors (Year)              | $\epsilon_{10} / \text{l mol}^{-1} \text{cm}^{-1}$ | Ref. |
|-----------------------------|----------------------------------------------------|------|
| Dogliotti and Hayon (1967)  | 460                                                | [1]  |
| Hayon and McGarvey (1967)   | 450                                                | [2]  |
| Roebke et al. (1969)        | 1100                                               | [3]  |
| Chawla and Fessenden (1975) | 1600                                               | [4]  |
| McElroy (1990)              | $1600 \pm 100$                                     | [5]  |
| Buxton et al. (1990)        | $1500 \pm 50$                                      | [6]  |

**Table S2a:** Mechanisms for the simulation calculation

| Reaction                                                                                                       |         | $k / \text{l mol}^{-1} \text{s}^{-1}$ | Ref. k    |
|----------------------------------------------------------------------------------------------------------------|---------|---------------------------------------|-----------|
| $\text{HSO}_5^{\cdot-} + h\nu(\lambda = 248 \text{ nm}) \longrightarrow \cdot\text{OH} + \text{SO}_4^{\cdot-}$ | (R-28)  | ---                                   | ---       |
| $\cdot\text{OH} + \text{HSO}_5^{\cdot-} \longrightarrow \text{H}_2\text{O} + \text{SO}_5^{\cdot-}$             | (R-29)  | $1.7 \cdot 10^7$                      | [7]       |
| $\text{SO}_4^{\cdot-} + \text{HSO}_5^{\cdot-} \longrightarrow \text{HSO}_4^{\cdot-} + \text{SO}_5^{\cdot-}$    | (R-30)  | $\leq 1 \cdot 10^5$                   | [8]       |
| $\text{SO}_5^{\cdot-} + \text{SO}_5^{\cdot-} \longrightarrow \text{S}_2\text{O}_8^{2-} + \text{O}_2$           | (R-31a) | $1.25 \cdot 10^8$                     | This work |
| $\text{SO}_5^{\cdot-} + \text{SO}_5^{\cdot-} \longrightarrow 2 \text{SO}_4^{\cdot-} + \text{O}_2$              | (R-31b) | $5.2 \cdot 10^6$                      | This work |
| $\text{SO}_4^{\cdot-} + \text{SO}_4^{\cdot-} \longrightarrow \text{S}_2\text{O}_8^{2-}$                        | (R-22)  | $1.6 \cdot 10^8$                      | [9]       |

**Table S2b:** Applied initial concentrations and absorption coefficients for the simulation calculation.

| Species                 | $c(t=0) / \text{mol l}^{-1}$ | $\epsilon (280\text{nm})$<br>[ $\text{l mol}^{-1} \text{cm}^{-1}$ ] | Reference<br>$\epsilon$ |
|-------------------------|------------------------------|---------------------------------------------------------------------|-------------------------|
| $\text{HSO}_5^{\cdot-}$ | $1 \cdot 10^{-3}$            | 5.2                                                                 | This work               |
| $\cdot\text{OH}$        | $1.24 \cdot 10^{-6}$         | 235                                                                 | [10]                    |
| $\text{SO}_4^{\cdot-}$  | $1.24 \cdot 10^{-6}$         | 450                                                                 | This work               |
| $\text{SO}_5^{\cdot-}$  | 0                            | 559                                                                 | This work               |

This journal is (c) The Owner Societies 2007

**Table S3:** Results to determine the absolute quantum yields of the  $\text{SO}_4^-$  formation from the photolysis of  $\text{HSO}_5^-$  at  $\lambda = 248 \text{ nm}$ .

| Experiment | $\lambda / \text{nm}$ | $A(\text{SO}_4^-)$ | $t / \mu\text{s}$ | $10^6 \epsilon_t(\text{SO}_4^-)$<br>$\text{mol l}^{-1}$ | $10^6 \epsilon_{t=0}(\text{SO}_4^-)$<br>$\text{mol l}^{-1}$ | $10^{-16} N(\text{SO}_4^-)$ | $W_{\text{LASER}} / \text{mJ}$ | $10^{-17} N_{\text{ABS}}$ | $\Phi$ |
|------------|-----------------------|--------------------|-------------------|---------------------------------------------------------|-------------------------------------------------------------|-----------------------------|--------------------------------|---------------------------|--------|
| SO5-50     | 405                   | 0.185              | 100               | 2.16                                                    | 2.32                                                        | 3.92                        | 410                            | 3.18                      | 0.123  |
|            | 425                   | 0.199              | 100               | 2.07                                                    | 2.21                                                        | 3.74                        | 410                            | 3.18                      | 0.118  |
|            | 445                   | 0.206              | 100               | 2.03                                                    | 2.17                                                        | 3.67                        | 410                            | 3.18                      | 0.116  |
|            | 465                   | 0.198              | 100               | 2.06                                                    | 2.21                                                        | 3.73                        | 410                            | 3.18                      | 0.117  |
| SO5-51     | 405                   | 0.188              | 100               | 2.20                                                    | 2.37                                                        | 4.00                        | 410                            | 3.18                      | 0.126  |
|            | 425                   | 0.206              | 100               | 2.15                                                    | 2.31                                                        | 3.89                        | 410                            | 3.18                      | 0.123  |
|            | 445                   | 0.220              | 100               | 2.20                                                    | 2.37                                                        | 3.99                        | 410                            | 3.18                      | 0.126  |
|            | 465                   | 0.191              | 100               | 1.98                                                    | 2.12                                                        | 3.57                        | 410                            | 3.18                      | 0.112  |
| SO5-52     | 405                   | 0.177              | 100               | 2.06                                                    | 2.21                                                        | 3.72                        | 410                            | 3.18                      | 0.117  |
|            | 425                   | 0.197              | 100               | 2.05                                                    | 2.19                                                        | 3.69                        | 410                            | 3.18                      | 0.116  |
|            | 445                   | 0.199              | 100               | 1.96                                                    | 2.09                                                        | 3.52                        | 410                            | 3.18                      | 0.111  |
|            | 465                   | 0.192              | 100               | 1.99                                                    | 2.13                                                        | 3.59                        | 410                            | 3.18                      | 0.113  |
| SO5-53     | 405                   | 0.182              | 100               | 2.12                                                    | 2.28                                                        | 3.84                        | 410                            | 3.18                      | 0.121  |
|            | 425                   | 0.198              | 100               | 2.06                                                    | 2.20                                                        | 3.71                        | 410                            | 3.18                      | 0.117  |
|            | 445                   | 0.204              | 100               | 2.01                                                    | 2.15                                                        | 3.62                        | 410                            | 3.18                      | 0.114  |
|            | 465                   | 0.184              | 100               | 1.90                                                    | 2.02                                                        | 3.41                        | 410                            | 3.18                      | 0.108  |
| SO5-54     | 405                   | 0.182              | 100               | 2.12                                                    | 2.28                                                        | 3.84                        | 410                            | 3.18                      | 0.121  |
|            | 425                   | 0.197              | 100               | 2.05                                                    | 2.19                                                        | 3.69                        | 410                            | 3.18                      | 0.116  |
|            | 445                   | 0.201              | 100               | 1.98                                                    | 2.11                                                        | 3.56                        | 410                            | 3.18                      | 0.112  |
|            | 465                   | 0.183              | 100               | 1.89                                                    | 2.01                                                        | 3.39                        | 410                            | 3.18                      | 0.107  |
| SO5-42     | 405                   | 0.237              | 5                 | 2.86                                                    | 2.87                                                        | 4.85                        | 410                            | 3.18                      | 0.153  |
| SO5-43     | 405                   | 0.233              | 5                 | 2.81                                                    | 2.82                                                        | 4.75                        | 410                            | 3.18                      | 0.150  |
| SO5-44     | 405                   | 0.223              | 5                 | 2.67                                                    | 2.68                                                        | 4.52                        | 410                            | 3.18                      | 0.142  |

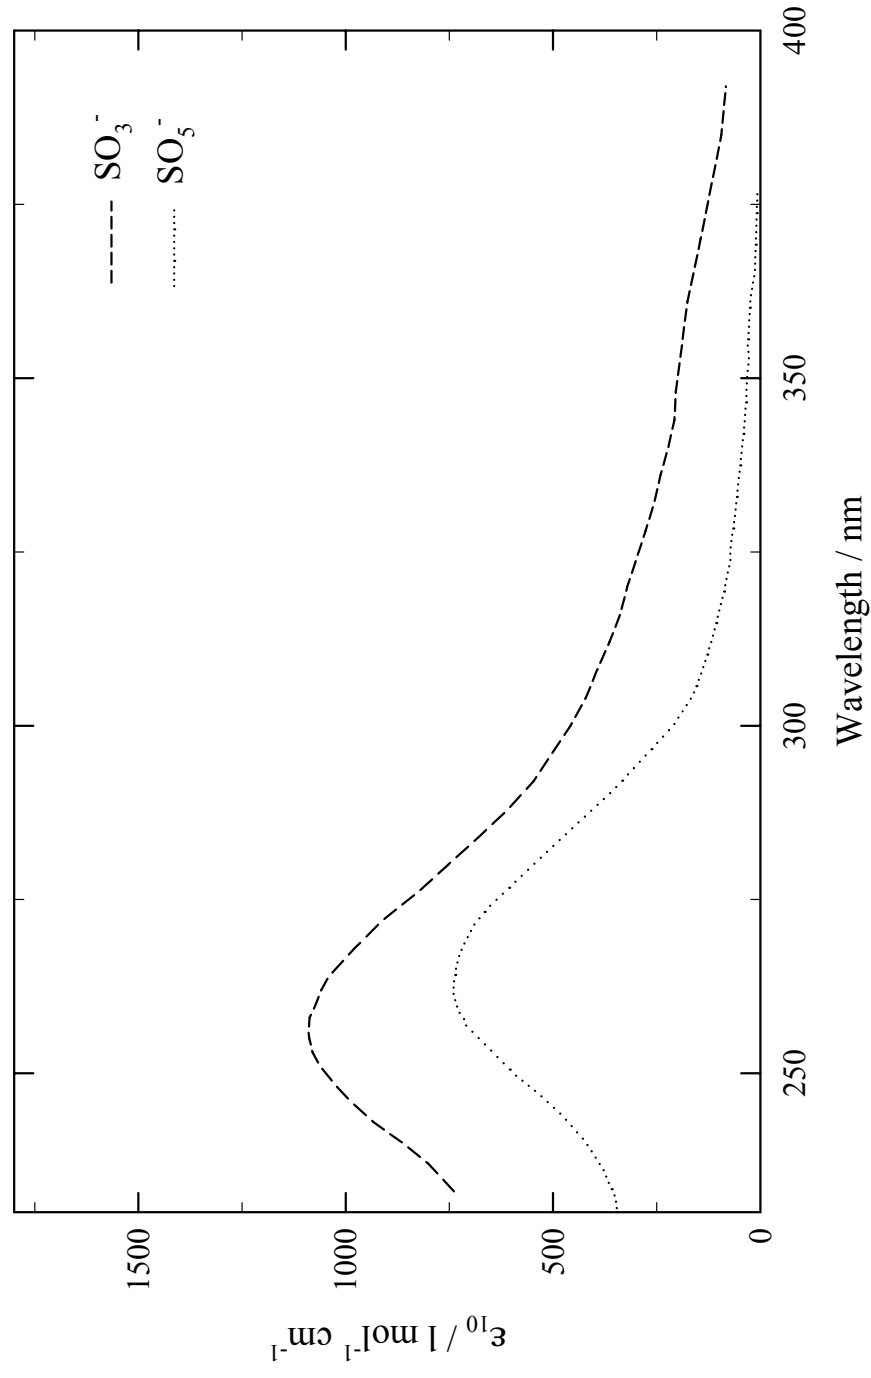

**Figure S1:** Aqueous phase spectra of  $\text{SO}_3^-$  and  $\text{SO}_5^-$  from the photolysis of  $\text{S}_2\text{O}_6^{2-}$  at  $\lambda = 193 \text{ nm}$  at 298 K.

**Table S4:** Results to determine the absolute quantum yields of the  $\text{SO}_3^-$  formation from the photolysis of  $\text{S}_2\text{O}_6^{2-}$  at  $\lambda = 193 \text{ nm}$ .

| Experiment      | $\lambda / \text{nm}$ | $\epsilon_{10}(\text{SO}_x^-)$<br>$\text{l mol}^{-1} \text{cm}^{-1}$ | $A(\text{SO}_x^-)$ | $t / \mu\text{s}$ | $10^7 c_t(\text{SO}_x^-)$<br>$\text{mol l}^{-1}$ | $10^7 c_{t=0}(\text{SO}_x^-)$<br>$\text{mol l}^{-1}$ | $10^{-16} N(\text{SO}_4^-)$ | $W_{\text{LASER}} / \text{mJ}$ | $10^{-16} N_{\text{ABS}}$ | $\Phi$ |
|-----------------|-----------------------|----------------------------------------------------------------------|--------------------|-------------------|--------------------------------------------------|------------------------------------------------------|-----------------------------|--------------------------------|---------------------------|--------|
| $\text{SO}_3^-$ | 240                   | 766                                                                  | 0.034              | 2.0               | 3.47                                             | 3.47                                                 | 2.35                        | 100                            | 2.93                      | 0.804  |
|                 | 250                   | 994                                                                  | 0.044              | 2.0               | 3.48                                             | 3.48                                                 | 2.36                        | 100                            | 2.93                      | 0.806  |
|                 | 260                   | 1090                                                                 | 0.049              | 2.0               | 3.54                                             | 3.55                                                 | 2.40                        | 100                            | 2.93                      | 0.821  |
|                 | 270                   | 989                                                                  | 0.045              | 2.0               | 3.59                                             | 3.59                                                 | 2.43                        | 100                            | 2.93                      | 0.831  |
|                 | 280                   | 790                                                                  | 0.036              | 2.0               | 3.56                                             | 3.56                                                 | 2.41                        | 100                            | 2.93                      | 0.824  |
|                 | 290                   | 584                                                                  | 0.027              | 2.0               | 3.58                                             | 3.58                                                 | 2.43                        | 100                            | 2.93                      | 0.829  |
|                 | 300                   | 437                                                                  | 0.020              | 2.0               | 3.55                                             | 3.55                                                 | 2.41                        | 100                            | 2.93                      | 0.822  |
| $\text{SO}_5^-$ | 240                   | 390                                                                  | 0.016              | 6.0               | 3.25                                             | 3.25                                                 | 2.20                        | 100                            | 2.93                      | 0.753  |
|                 | 250                   | 560                                                                  | 0.023              | 6.0               | 3.25                                             | 3.25                                                 | 2.20                        | 100                            | 2.93                      | 0.753  |
|                 | 260                   | 726                                                                  | 0.030              | 6.0               | 3.30                                             | 3.30                                                 | 2.24                        | 100                            | 2.93                      | 0.764  |
|                 | 270                   | 711                                                                  | 0.030              | 6.0               | 3.36                                             | 3.36                                                 | 2.28                        | 100                            | 2.93                      | 0.778  |
|                 | 280                   | 559                                                                  | 0.024              | 6.0               | 3.41                                             | 3.41                                                 | 2.31                        | 100                            | 2.93                      | 0.791  |
|                 | 290                   | 360                                                                  | 0.016              | 6.0               | 3.45                                             | 3.45                                                 | 2.34                        | 100                            | 2.93                      | 0.800  |
|                 | 300                   | 188                                                                  | 0.008              | 6.0               | 3.48                                             | 3.48                                                 | 2.36                        | 100                            | 2.93                      | 0.806  |

**Table S5:** Concentrations of the chlorine-containing compounds present in the carried out experiments.

| Experiment | Abs.* | $[\text{Cl}_2]/\text{mol l}^{-1}$ | $[\text{HOCl}] = [\text{Cl}]/\text{mol l}^{-1}$ | $[\text{Cl}_3^-]/\text{mol l}^{-1}$ |
|------------|-------|-----------------------------------|-------------------------------------------------|-------------------------------------|
| CL2-1      | 0.105 | $2.0 \cdot 10^{-5}$               | $4.6 \cdot 10^{-4}$                             | $1.8 \cdot 10^{-9}$                 |
| CL2-2      | 0.209 | $1.8 \cdot 10^{-5}$               | $4.4 \cdot 10^{-4}$                             | $1.6 \cdot 10^{-9}$                 |
| CL2-3      | 0.060 | $2.1 \cdot 10^{-5}$               | $4.7 \cdot 10^{-4}$                             | $1.9 \cdot 10^{-9}$                 |

\*: Measured absorption in the mother solution at  $\lambda = 325$  nm

This journal is (c) The Owner Societies 2007

**Table S6:** Parameter for the evaluation of the quantum yields from the HOCl photolysis in aqueous solution.  $\lambda = 248$  nm,  $T = 298$  K,  $[\text{HOCl}] = 4.4 \cdot 10^{-4}$  mol  $\text{l}^{-1}$

| $\lambda$ / nm | A (Cl) | t / ns | $10^7 c_t$ (Cl)<br>mol $\text{l}^{-1}$ | $10^6 c_{t=0}$ (Cl)<br>mol $\text{l}^{-1}$ | $10^{-16} N$ (Cl) | $W_{\text{LASER}}$ /<br>mJ | $10^{-16} N_{\text{ABS}}$ | $\Phi$ |
|----------------|--------|--------|----------------------------------------|--------------------------------------------|-------------------|----------------------------|---------------------------|--------|
| 295            | 0.026  | 50     | 7.23                                   | 1.24                                       | 2.09              | 290                        | 8.45                      | 0.248  |
| 300            | 0.044  | 50     | 7.30                                   | 1.25                                       | 2.11              | 290                        | 8.45                      | 0.250  |
| 305            | 0.063  | 50     | 7.34                                   | 1.27                                       | 2.13              | 290                        | 8.45                      | 0.253  |
| 310            | 0.082  | 50     | 7.45                                   | 1.28                                       | 2.15              | 290                        | 8.45                      | 0.255  |
| 315            | 0.097  | 50     | 7.51                                   | 1.29                                       | 2.17              | 290                        | 8.45                      | 0.257  |
| 320            | 0.105  | 50     | 7.54                                   | 1.29                                       | 2.18              | 290                        | 8.45                      | 0.258  |
| 325            | 0.104  | 50     | 7.54                                   | 1.29                                       | 2.18              | 290                        | 8.45                      | 0.258  |
| 330            | 0.095  | 50     | 7.50                                   | 1.29                                       | 2.17              | 290                        | 8.45                      | 0.257  |
| 335            | 0.081  | 50     | 7.44                                   | 1.28                                       | 2.15              | 290                        | 8.45                      | 0.255  |
| 340            | 0.064  | 50     | 7.38                                   | 1.27                                       | 2.13              | 290                        | 8.45                      | 0.253  |
| 345            | 0.052  | 50     | 7.33                                   | 1.26                                       | 2.12              | 290                        | 8.45                      | 0.251  |
| 350            | 0.040  | 50     | 7.29                                   | 1.25                                       | 2.11              | 290                        | 8.45                      | 0.250  |
| 355            | 0.030  | 50     | 7.25                                   | 1.24                                       | 2.10              | 290                        | 8.45                      | 0.248  |
| 360            | 0.023  | 50     | 7.22                                   | 1.24                                       | 2.09              | 290                        | 8.45                      | 0.247  |
| 365            | 0.017  | 50     | 7.20                                   | 1.24                                       | 2.08              | 290                        | 8.45                      | 0.247  |

**Table S7:** Sink reactions for the chlorine atom in the Cl<sub>2</sub>/HOCl-system. [HOCl] = [Cl<sup>-</sup>] = 4.4·10<sup>-4</sup> mol l<sup>-1</sup>

| Reaction                                                        |        | k <sub>2nd</sub> / l mol <sup>-1</sup> s <sup>-1</sup> | k <sub>1st</sub> / s <sup>-1</sup> | Ref. |
|-----------------------------------------------------------------|--------|--------------------------------------------------------|------------------------------------|------|
| Cl· + Cl· → Cl <sub>2</sub>                                     | (R-42) | 1.0·10 <sup>8</sup>                                    | ---                                | [11] |
| Cl· + HOCl → HCl + ·OCl                                         | (R-43) | 3.0·10 <sup>9</sup>                                    | 1.3·10 <sup>6</sup>                | [11] |
| Cl· + Cl <sup>-</sup> → Cl <sub>2</sub> · <sup>-</sup>          | (R-44) | 2.1·10 <sup>10</sup>                                   | 9.2·10 <sup>6</sup>                | [11] |
| Cl· + H <sub>2</sub> O → H <sup>+</sup> + Cl <sup>-</sup> + ·OH | (R-45) | ---                                                    | 2.5·10 <sup>5</sup>                | [5]  |

This journal is (c) The Owner Societies 2007

**Table S8:** Parameter for the evaluation of the quantum yields from the chloroacetone photolysis in aqueous solution.  $\lambda = 248$  nm,  $T = 298$  K,  $[\text{CH}_3\text{COCH}_2\text{Cl}] = 5 \cdot 10^{-4}$  mol  $\text{l}^{-1}$ .

| $\lambda$ / nm | A (Cl) | t / ns | $10^6 c_t$ (Cl)<br>mol $\text{l}^{-1}$ | $10^6 c_{t=0}$ (Cl)<br>mol $\text{l}^{-1}$ | $10^{-16} N$ (Cl) | $W_{\text{LASER}}$ /<br>mJ | $10^{-17} N_{\text{ABS}}$ | $\Phi$ |
|----------------|--------|--------|----------------------------------------|--------------------------------------------|-------------------|----------------------------|---------------------------|--------|
| 275            | 0.071  | 50     | 0.99                                   | 1.02                                       | 1.73              | 290                        | 1.012                     | 0.171  |
| 280            | 0.079  | 50     | 1.00                                   | 1.03                                       | 1.73              | 290                        | 1.012                     | 0.171  |
| 285            | 0.087  | 50     | 1.00                                   | 1.03                                       | 1.74              | 290                        | 1.012                     | 0.172  |
| 290            | 0.099  | 50     | 1.01                                   | 1.04                                       | 1.75              | 290                        | 1.012                     | 0.173  |
| 295            | 0.108  | 50     | 1.01                                   | 1.04                                       | 1.76              | 290                        | 1.012                     | 0.174  |
| 300            | 0.127  | 50     | 1.02                                   | 1.06                                       | 1.78              | 290                        | 1.012                     | 0.176  |
| 305            | 0.132  | 50     | 1.03                                   | 1.06                                       | 1.79              | 290                        | 1.012                     | 0.176  |
| 310            | 0.140  | 50     | 1.03                                   | 1.06                                       | 1.79              | 290                        | 1.012                     | 0.177  |
| 315            | 0.137  | 50     | 1.03                                   | 1.06                                       | 1.79              | 290                        | 1.012                     | 0.177  |
| 320            | 0.130  | 50     | 1.02                                   | 1.06                                       | 1.78              | 290                        | 1.012                     | 0.176  |
| 325            | 0.118  | 50     | 1.02                                   | 1.05                                       | 1.77              | 290                        | 1.012                     | 0.175  |
| 330            | 0.099  | 50     | 1.01                                   | 1.04                                       | 1.75              | 290                        | 1.012                     | 0.173  |
| 335            | 0.085  | 50     | 1.00                                   | 1.03                                       | 1.74              | 290                        | 1.012                     | 0.172  |
| 340            | 0.070  | 50     | 0.99                                   | 1.02                                       | 1.73              | 290                        | 1.012                     | 0.171  |
| 345            | 0.050  | 50     | 0.98                                   | 1.01                                       | 1.71              | 290                        | 1.012                     | 0.169  |
| 350            | 0.040  | 50     | 0.98                                   | 1.01                                       | 1.70              | 290                        | 1.012                     | 0.168  |
| 355            | 0.023  | 50     | 0.97                                   | 1.00                                       | 1.68              | 290                        | 1.012                     | 0.166  |



**Annex I Thermochemistry of the photodissociation processes in aqueous solution**

In order to obtain the excess energies for the different systems, it is necessary to know the bond dissociation energy (BDE) of the X-O<sup>-</sup> bonds in the precursors molecules.

In the systems where no anions are formed (e.g., H<sub>2</sub>O<sub>2</sub>, HONO and HOCl), the gas phase BDEs have been considered. For all the other systems where one or both of the fragments are anions the BDEs must be calculated and in the case of the oxy-anions these represent the bond energies of the reaction enthalpies for the reactions:

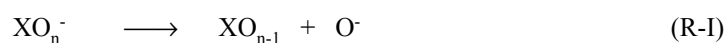

Whereas for the photolysis of the sulphuroxyl anions,

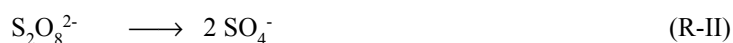

As well as

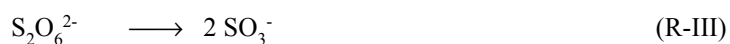

The aqueous phase standard enthalpies of formation ( $\Delta H_{f(\text{aq})}^0$ ) for all the treated species are known<sup>12</sup>. Furthermore, the gas phase standard enthalpies of formation ( $\Delta H_{f(\text{g})}^0$ ) for all the neutral substrate and products as well as for most of the anions are also existing<sup>13</sup>.

The thermochemistry of several dissociation processes of oxy anions has been discussed with a cyclic process by Friedman<sup>14</sup>. This cyclic process is depicted in Figure I.

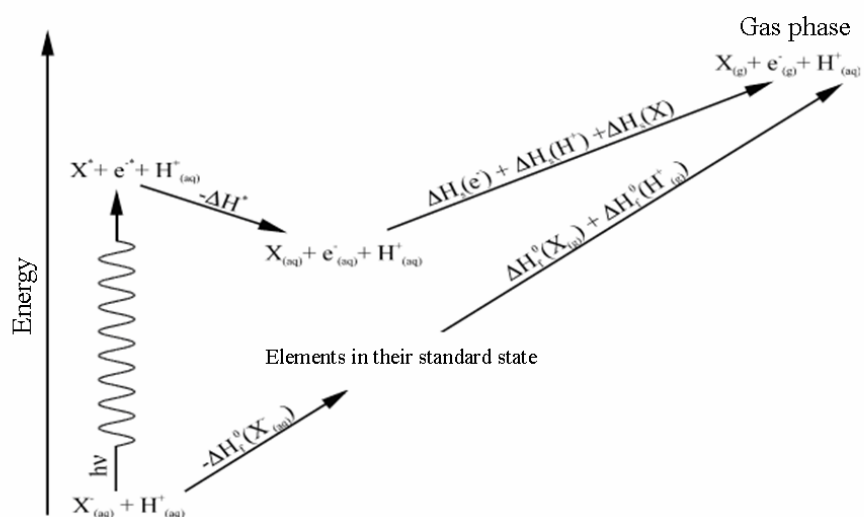

**Figure S2:** Thermochemistry of the photodissociation of oxy-anions after Friedman<sup>14</sup>.

From the thermodynamic treatment after Friedman as well as the following work of Treinin (1970)<sup>15</sup> it follows that the reaction enthalpy ( $\Delta H_R$ ) for the reactions like:

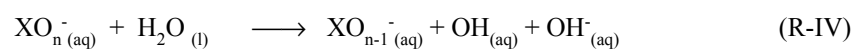

It can be represented and calculated as the sum of R-V:

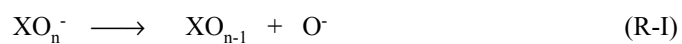

And the reaction of  $\text{O}^-$  with the water, e.g.

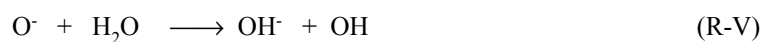

This journal is (c) The Owner Societies 2007

However, the reaction enthalpy for the reaction (R-V) can be calculated only for the gas phase since the aqueous phase formation enthalpy ( $\Delta H_{f(aq)}^0$ ) of  $O^-$  radical anion is not known. From the gas phase data a value of reaction enthalpy for reaction (R-V) of  $\Delta H_R^0(\text{R-V}) = 38.095 \text{ kJ mol}^{-1}$  is given, so that the reaction enthalpy for (R-I) can be calculated as follow:

$$\text{BDE} = \Delta H_R^0(\text{R-I}) = \Delta H_R^0(\text{R-IV}) - \Delta H_R^0(\text{R-V}) \quad (\text{I})$$

Whereas the Treinin values have been considered for the reaction enthalpy of the reactions like (R-IV)<sup>15</sup>. The obtained values have been summarised in Table IX.

The gas phase BDEs have been applied for in the case of HOX with X= OH, Cl, NO.

For the peroxy energy bond in the peroxomonosulphate anion ( $\text{HSO}_5^-$ ) the value of  $\text{BDE} = 377 \text{ kJ mol}^{-1}$  given by Benson<sup>16</sup> has been considered. A BDE of  $92 \text{ kJ mol}^{-1}$  is given for the peroxy bond in the  $\text{H}_2\text{S}_2\text{O}_8$  molecule, which has been also applied for the peroxodisulphate anion. A thermochemical calculation for this bond leads to a BDE ( $\text{O}_3\text{S-OO-SO}_3^-$ ) =  $93 \text{ kJ mol}^{-1}$ , in which the standard entropy of formation  $\Delta S_f^0$  has been assumed equivalent to the one of the sulphate radical anion ( $\text{SO}_4^-$ ) ( $\Delta S_f^0(\text{SO}_4^{2-}) = 20.8 \text{ J mol}^{-1} \text{ K}^{-1}$ <sup>12</sup>). The good agreement obtained with the Benson value shows the validity of the taken approximation.

No BDE is available for the S-S bond in the dithionate anion, therefore an estimation have been done. The Gibbs free energy of of formation ( $\Delta G_f^0$ ) for  $\text{S}_2\text{O}_6^{2-}$  and  $\text{SO}_3^-$  are  $\Delta G_f^0(\text{S}_2\text{O}_6^{2-}) = -960 \text{ kJ mol}^{-1}$ <sup>12</sup> and  $\Delta G_f^0(\text{SO}_3^-) = -426 \text{ kJ mol}^{-1}$ , respectively<sup>12</sup>. A similar approximation to the case of sulphate radical anion has been taken and a  $\Delta S_f^0(\text{SO}_3^{2-}) = \Delta S_f^0(\text{SO}_3^-) = -293 \text{ J mol}^{-1} \text{ K}^{-1}$ <sup>12</sup> have been applied. The aqueous phase  $\Delta S_f^0$  of dithionate anion is also not known and it has been estimated equal to  $\Delta S_f^0(\text{S}_2\text{O}_6^{2-}) = 160 \text{ J mol}^{-1} \text{ K}^{-1}$  as average value between  $\text{S}_2\text{O}_4^{2-}$  and  $\text{S}_2\text{O}_8^{2-}$  values<sup>12</sup>. Applying the Gibbs-Helmholtz relationship, the bond dissociation energy of S-S bond in the dithionate anion has been calculated as follow:

$$\text{BDE}(\text{O}_3\text{S-SO}_3^-) = 2 \cdot \Delta G_f^0(\text{SO}_3^-) - \Delta G_f^0(\text{S}_2\text{O}_6^{2-}) - \frac{298}{1000} \cdot (2 \cdot \Delta S_f^0(\text{SO}_3^-) - \Delta S_f^0(\text{S}_2\text{O}_6^{2-})) \quad (\text{II})$$

This journal is (c) The Owner Societies 2007

It follows a value of BDE ( $\text{O}_3\text{S-SO}_3^-$ ) = 173 kJ mol<sup>-1</sup>. This results is in good agreement with suggestion of Waygood und McElroy, whose indicated that the BDE of the S-S-bond in  $\text{S}_2\text{O}_6^{2-}$  should be double respect to the BDE of the peroxy bond in  $\text{S}_2\text{O}_8^{2-}$ <sup>17</sup>.

**Table S9:** Applied bond dissociation energies (BDEs, kJ mol<sup>-1</sup>)

| <b>Precursor</b> $\text{XO}_n^-$       | <b>BDE</b> ( $\text{XO}_{n-1}\text{-O}^-$ ) /kJ mol <sup>-1</sup>   | <b>Measurement / Ref.</b> |
|----------------------------------------|---------------------------------------------------------------------|---------------------------|
| $\text{NO}_2^-$                        | 192                                                                 | This work, see text       |
| $\text{NO}_3^-$                        | 217                                                                 | This work, see text       |
| $\text{ClO}^-$                         | 230                                                                 | This work, see text       |
| $\text{ClO}_2^-$                       | 150                                                                 | This work, see text       |
| <b>Precursor</b> $\text{XOH}$          | <b>BDE</b> ( $\text{X-OH}$ ) /kJ mol <sup>-1</sup>                  | <b>Measurement / Ref.</b> |
| $\text{H}_2\text{O}_2$                 | 213 ± 4                                                             | Gas phase, [12]           |
| $\text{HOCl}$                          | 251 ± 13                                                            | Gas phase, [12]           |
| $\text{HONO}$                          | 206                                                                 | Gas phase, [12]           |
| $\text{HSO}_5^-$                       | 377                                                                 | Benson, [16]              |
| <b>Precursor</b> $[(\text{XO}_n^-)]_2$ | <b>BDE</b> ( $\text{XO}_n^- \text{-XO}_n^-$ ) /kJ mol <sup>-1</sup> | <b>Measurement / Ref.</b> |
| $\text{S}_2\text{O}_8^{2-}$            | 92                                                                  | Benson, [16]              |
| $\text{S}_2\text{O}_6^{2-}$            | 173                                                                 | This work, see text       |

From the obtained BDEs the total excess energy can then be calculated as:

$$W_{\text{exc}} = W(\text{h}\nu) - \text{BDE} \quad [\text{kJ mol}^{-1}] \quad (\text{III})$$

**Annex References**

- 1 L. Dogliotti and E. Hayon, *J. Phys. Chem.*, 1967, **71**, 3802-3808.
- 2 E. Hayon and J. J. Mcgarvey, *J. Phys. Chem.*, 1967, **71**, 1472-1477.
- 3 W. Roebke, M. Renz and A. Henglein, *Int. J. Radiat. Phys. Chem.*, 1969, **1**, 39-44.
- 4 O. P. Chawla and R. W. Fessenden, *J. Phys. Chem.*, 1975, **79**, 2693-2700.
- 5 W. J. McElroy, *J. Phys. Chem.*, 1990, **94**, 2435-2441.
- 6 G. V. Buxton, G. A. Salmon and N. D. Wood, EUROTRAC Symp. '90. SPB, Academic Publishing bv, Den Haag:1991.
- 7 R. Steudel, *Chemie der Nichtmetalle*, DeGruyter, Berlin: 1974.
- 8 P. Maruthamuthu and P. Neta, *J. Phys. Chem.*, 1977, **81**, 937-940.
- 9 H. Herrmann, A. Reese and R. Zellner, *J. Mol. Struct.*, 1995, **348**, 183-186.
- 10 G. G. Jayson, B. J. Parsons and A. J. Swallow, *J. Chem. Soc.-Faraday Trans. I*, 1973, 1597-1607.
- 11 U. K. Klaning and T. Wolff, *Ber. Bunsen. Phys. Chem.*, 1985, **89**, 243-245.
- 12 D. R. Lide, *Handbook of Chemistry and Physics*, CRC Press, Boca Raton: 1995.
- 13 S. G. Lias, J. E. Bartmess, J. F. Liebman, J. L. Holmes, R. D. Levin and W. G. Mallard, *J. Phys. Chem. Ref. Data*, 1988, **17**, 1-861.
- 14 H. L. Friedman, *J. Chem. Phys.*, 1953, **21**, 318-322.
- 15 A. Treinin, *Israel J. Chem.*, 1970, **8**, 103-113.
- 16 S. W. Benson, *Chem. Rev.*, 1978, **78**, 23-35.
- 17 S. J. Waygood and W. J. Mcelroy, *J. Chem. Soc.-Faraday Trans.*, 1992, **88**, 1525-1530.
